# Supplementary material
Source: Royal Society of Chemistry journal article supplement (doi:10.1039/d6ce00248j)
Supplement: d6ce00248j1.pdf [file d6ce00248j1.pdf]

## **Ternary Metal-Organic Framework of FeCoZn-ZIF as an Efficient Electrocatalyst for the Oxygen Evolution Reaction**

*Yan E<sup>a</sup>, Heng Li<sup>a</sup>, Hu Fan<sup>a</sup>, Mingkun Du<sup>a</sup>, Ke Sun<sup>a</sup>, Yuxuan Li<sup>a</sup>, Shuo Dong<sup>a</sup>, Yijie Liu<sup>a</sup>, Yi Liu<sup>a</sup>, Xuelin Dong<sup>a\*</sup>, Xianxu Chu<sup>a\*</sup>.*

*<sup>a</sup>Henan Key Laboratory of Biomarker Detection and Diagnosis for Neurodegenerative Diseases, College of Chemistry and Chemical Engineering, Shangqiu Normal University, Shangqiu 476000, PR China.*

*\*Corresponding authors, emails: [dongaynu@163.com](mailto:dongaynu@163.com). [xxchu13633@163.com](mailto:xxchu13633@163.com).*

Figure S1–S4

Table S1

Reference

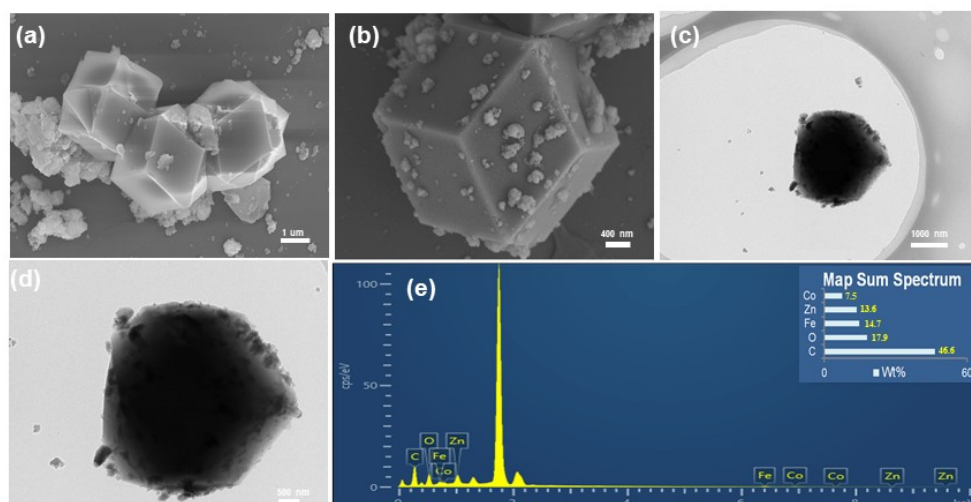

**Figure S1.** (a, b) SEM images of Fe<sub>1</sub>Co<sub>1</sub>Zn<sub>2</sub>-ZIF, (c, d) TEM images, (e) EDX spectrum.

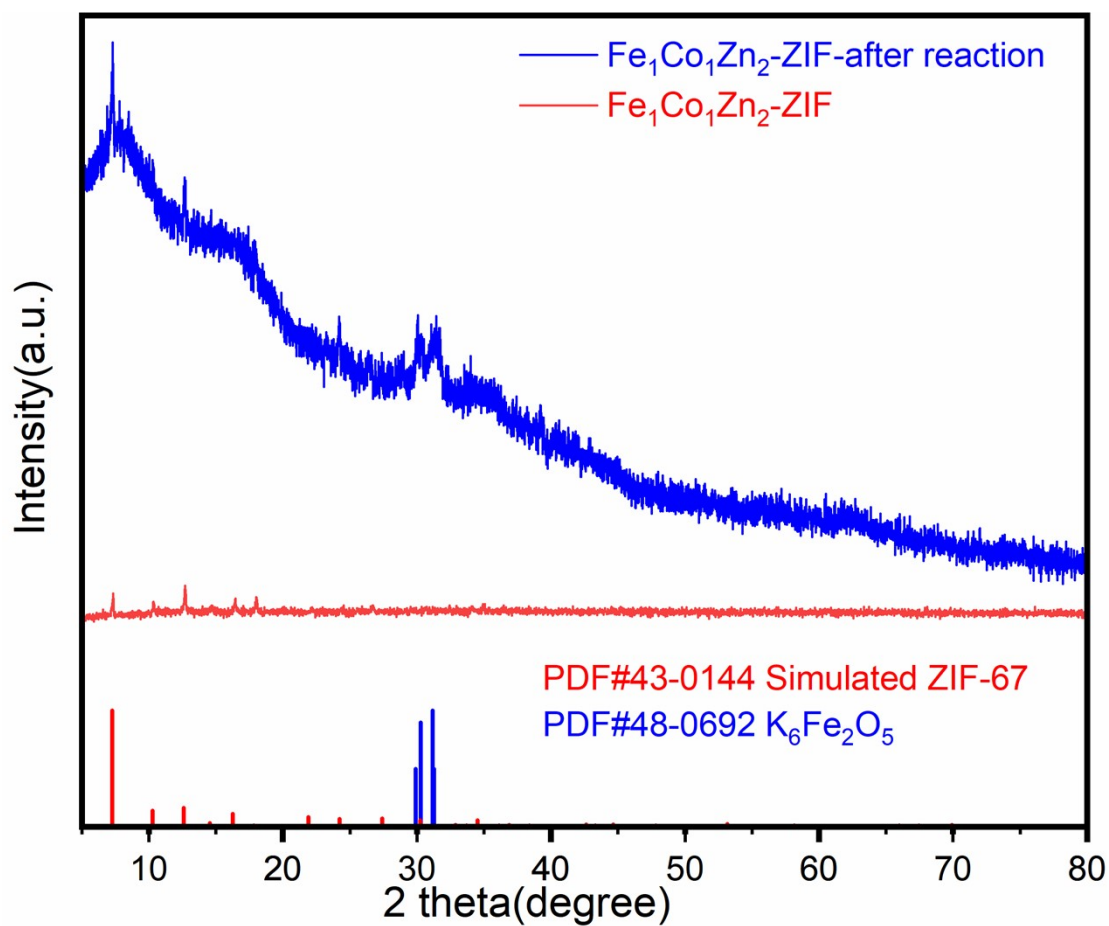

**Figure S2.** XRD pattern of Fe<sub>1</sub>Co<sub>1</sub>Zn<sub>2</sub>-ZIF before and after stability test (Cu K $\alpha$ ).

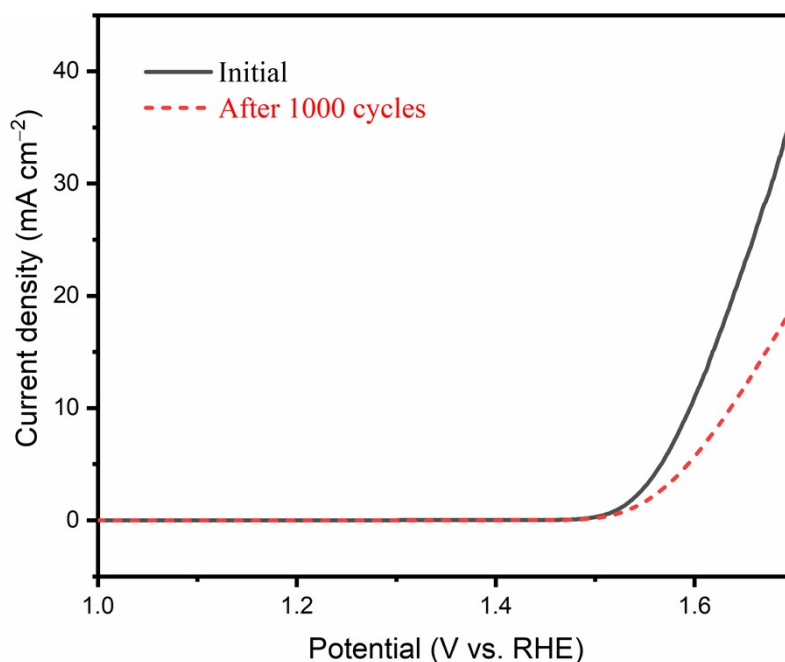

**Figure S3.** LSV Polarization curve of  $\text{Fe}_1\text{Co}_1\text{Zn}_2\text{-ZIF}$  before and after 1000 cycles.

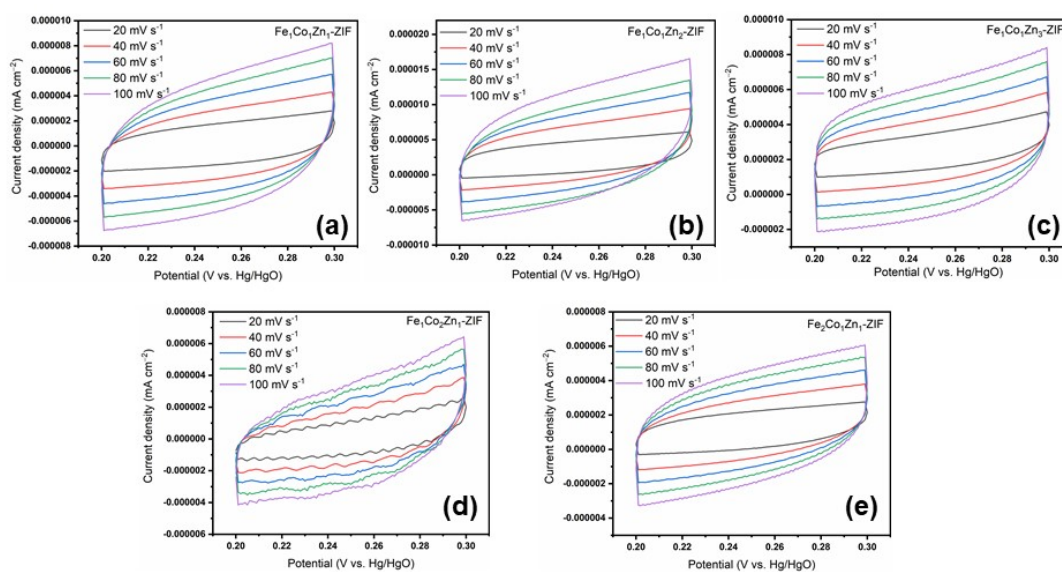

**Figure S4.** Cyclic voltammograms of different samples at various scan rates: (a) CV curves of  $\text{Fe}_1\text{Co}_1\text{Zn}_1\text{-ZIF}$ ; (b) CV curves of  $\text{Fe}_1\text{Co}_1\text{Zn}_2\text{-ZIF}$ ; (c) CV curves of  $\text{Fe}_1\text{Co}_1\text{Zn}_3\text{-ZIF}$ ; (d) CV curves of  $\text{Fe}_1\text{Co}_2\text{Zn}_1\text{-ZIF}$ ; (e) CV curves of  $\text{Fe}_2\text{Co}_1\text{Zn}_1\text{-ZIF}$ .

**Table S1** Comparison of the OER activities of some ZIF electrocatalysts.

| Catalysts                                            | J<br>(mA cm <sup>-2</sup> ) | Overpotential<br>(mV) | Tafel slope<br>(mV dec <sup>-1</sup> ) | Stability<br>(h) | Reference |
|------------------------------------------------------|-----------------------------|-----------------------|----------------------------------------|------------------|-----------|
| ZIF-67                                               | 10                          | 450                   | 144                                    | /                | [1]       |
| Zn-ZIF-800                                           | 10                          | 595                   | /                                      | /                | [2]       |
| CoZn-ZIF                                             | 10                          | 569                   | 124.6                                  | /                | [3]       |
| Fe-ZIF/NFs                                           | 10                          | 612                   | 185                                    | /                | [4]       |
| FeCo-ZIF/NFs                                         | 10                          | 286                   | 77                                     | 12               | [4]       |
| NiCo-ZIF                                             | 10                          | 445                   | 210                                    | /                | [5]       |
| NiCoZn-ZIF                                           | 10                          | 370                   | 126.7                                  | /                | [1]       |
| NiCoZn-ZIF/HTTP                                      | 10                          | 193                   | 97.4                                   | 6                | [1]       |
| ZIF-67-CNT                                           | 10                          | 390                   | 95.7                                   | /                | [6]       |
| ZIF-Co <sub>0.85</sub> Se                            | 10                          | 360                   | 62                                     | 2.77             | [6]       |
| Co-ZIF-550-N <sub>2</sub>                            | 10                          | 405                   | 281                                    | /                | [7]       |
| ZIF-8@ZIF-67@POM                                     | 10                          | 490                   | 88                                     | 10               | [8]       |
| Commerical RuO <sub>2</sub>                          | 10                          | 366                   | 125                                    | /                | [5]       |
| Fe <sub>1</sub> Co <sub>1</sub> Zn <sub>2</sub> -ZIF | 10                          | 366                   | 78.7                                   | 28               | This work |

## Reference

- [1] Li X, Li J, Kurbanjan D, Yu T, Du H. Synergistic effect of trimetallic doping and  $\pi$ - $\pi$  conjugation in NiZnCo-ZIF@HHTP for efficient oxygen evolution reaction. *J. Electroanal. Chem.* **2023**, 937, 117410.
- [2] Zhang HJ, Chen B, Feng X, Yu M, Luo J, Xue Y. Nanoparticles of CoFeZn supported on N-doped carbon as bifunctional catalysts for oxygen reduction and oxygen evolution. *ACS Appl. Nano Mater.* **2024**, 7, 23054–23061.
- [3] Wang L, Meng T, Chen C, Fan Y, Zhang Q, Wang H, Zhang Y. Facile synthesis of ZnCo-ZIFs-derived  $Zn_xCo_{3-x}O_4$  hollow polyhedron for efficient oxygen evolution reduction. *J. Colloid Interface Sci.* **2018**, 532, 650–656.
- [4] Sankar SS, Keerthana G, Manjula K, Sharad JH, Kundu S. Electrospun Fe-incorporated ZIF-67 nanofibers for effective electrocatalytic water splitting. *Inorg. Chem.* **2021**, 60, 4034–4046.
- [5] Wang C, Gao P, Yao X, Sun X, Du H. NiCo-ZIF-based ternary MOF composite materials for high-efficiency and stable oxygen evolution reactions. *CrystEngComm.* **2025**, 27, 5595–5602.
- [6] Wen H, Zhang S, Yu T, Yi Z, Guo R. ZIF-67-based catalysts for oxygen evolution reaction. *Nanoscale.* **2021**, 13, 12058–12087.
- [7] Sankar SS, Ede SR, Anantharaj S, Karthick K, Sangeetha K, Kundu S. Electrospun cobalt-ZIF micro-fibers for efficient water oxidation under unique pH conditions. *Catal Sci Technol* **2019**, 9, 1847–1856.
- [8] Usman K A S, Maina J W, Seyedin S, Conato M T, Payawan L M, Dumée L F, Razal J M. Downsizing metal–organic frameworks by bottom-up and top-down methods *NPG Asia Mater.* **2020**, 12, 58.
